# Supplementary material for: Operational evaluation of rapid diagnostic testing for Ebola Virus Disease in Guinean laboratories
Source: PLoS One. 2017 Nov 30;12(11):e0188047. doi: 10.1371/journal.pone.0188047 (PMC5708756; doi:10.1371/journal.pone.0188047)
Supplement: S2 Annex — In French and English. (PDF) [file pone.0188047.s005.pdf]

**Évaluation du Programme Pilote avec les TDR-e**  
**CHECKLIST POUR VISITE DE LABORATOIRE**

Date: \_\_\_\_\_

Nom du laboratoire : \_\_\_\_\_

| ITEMS                                                                         | OUI | NON |
|-------------------------------------------------------------------------------|-----|-----|
| 1. POS ou aides mémoire sont disponibles, visibles et à jour                  |     |     |
| 2. Thermomètre dans le site de stockage pour les TDR-e                        |     |     |
| 3. Les kits sont stockés à la bonne température (2-30 C)                      |     |     |
| 4. Suivi des stocks comprend le numéro de lot et la date d'expiration         |     |     |
| 5. Thermomètre dans le site où les TDR-e sont effectués                       |     |     |
| 6. Le site pour faire le test à la bonne température (15-40 C)                |     |     |
| 7. Log de températures de labo est rempli chaque jour                         |     |     |
| 8. Chronomètre au site de test (cellulaire okay)                              |     |     |
| 9. Frigo (de 2-8 C) au laboratoire                                            |     |     |
| 10. Contrôles au laboratoire                                                  |     |     |
| 11. Registre de contrôles faites au laboratoire                               |     |     |
| 12. L'écriture est lisible sur les registres du labo                          |     |     |
| 13. Les registres sont remplis au complet                                     |     |     |
| 14. Poubelles pour les déchets dangereux et non dangereux dans le laboratoire |     |     |
| 15. EPIs (gants, blouse, protection pour le visage) sont disponibles          |     |     |
| 16. Installation de lavage des mains est disponible                           |     |     |
| 17. Disponibilité d'un téléphone pour envoyer des données                     |     |     |

|                                                 | # personnes |            |
|-------------------------------------------------|-------------|------------|
|                                                 | Titulaires  | Stagiaires |
| Personnes qui ont rempli un questionnaire       |             |            |
| Total de personnes qui font les TDR-e           |             |            |
| Total de personnes qui travaillent dans ce labo |             |            |

Notes :

**Evaluation of Ebola RDT Pilot Program**  
**CHECKLIST FOR LABORATORY VISIT**

Date: \_\_\_\_\_

Laboratory name : \_\_\_\_\_

| ITEMS                                                                        | YES | NO |
|------------------------------------------------------------------------------|-----|----|
| 1. SOP or job aids are available, visible and up-to-date                     |     |    |
| 2. Thermometer in the storage site for the Ebola RDTs                        |     |    |
| 3. The kits are stored at the correct temperature (2-30 C)                   |     |    |
| 4. Inventory tracking includes the lot number and expiration date            |     |    |
| 5. Thermometer in the site where Ebola RDTs are performed                    |     |    |
| 6. Site for performing the Ebola RDT is at the correct temperature (15-40 C) |     |    |
| 7. The laboratory temperature log is filled each day                         |     |    |
| 8. Timer at the testing site (cellphone okay)                                |     |    |
| 9. Refrigerator (at 2-8 C) in the laboratory                                 |     |    |
| 10. Controls at the laboratory                                               |     |    |
| 11. Register of control tests done at the laboratory                         |     |    |
| 12. Writing is legible on the laboratory registers                           |     |    |
| 13. The registers are completed in full                                      |     |    |
| 14. Waste bins for hazardous and non-hazardous waste in the laboratory       |     |    |
| 15. PPE (gloves, gown, face protection) are available                        |     |    |
| 16. Handwashing station is available                                         |     |    |
| 17. A telephone for sending data is available                                |     |    |

|                                           | # persons     |          |
|-------------------------------------------|---------------|----------|
|                                           | Functionaries | Trainees |
| Persons who completed a questionnaire     |               |          |
| Total persons who perform Ebola RDTs      |               |          |
| Total persons who work in this laboratory |               |          |

Notes :
